# Supplementary material for: Key parameters to enhance the antibacterial effect of graphene oxide in solution
Source: Royal Society of Chemistry journal article supplement (doi:10.1039/d0ra07945f), 2021-01-01
Supplement: d0ra07945f1.pdf [file d0ra07945f1.pdf]

## Key parameters to enhance the antibacterial effect of graphene oxide in solution

Grecia Guadalupe Montes-Duarte<sup>1</sup>, Guillermo Tostado-Blázquez<sup>1</sup>, K. L. S. Castro<sup>2</sup>, Joyce R. Araujo<sup>2</sup>, C. A. Achete<sup>2</sup>, José Luis Sánchez-Salas<sup>1</sup>, Jessica Campos-Delgado<sup>1\*</sup>

1 Universidad de las Américas Puebla, Departamento de Ciencias Químico Biológicas, ExHacienda Sta. Catarina Mártir S/N, San Andrés Cholula, Puebla, 72810, México

2 Instituto Nacional de Metrologia, Qualidade e Tecnologia, Av. Nossa Sra. das Graças, 50, 25250-020 Duque de Caxias, Brazil

Corresponding author: [jessica.campos@udlap.mx](mailto:jessica.campos@udlap.mx)

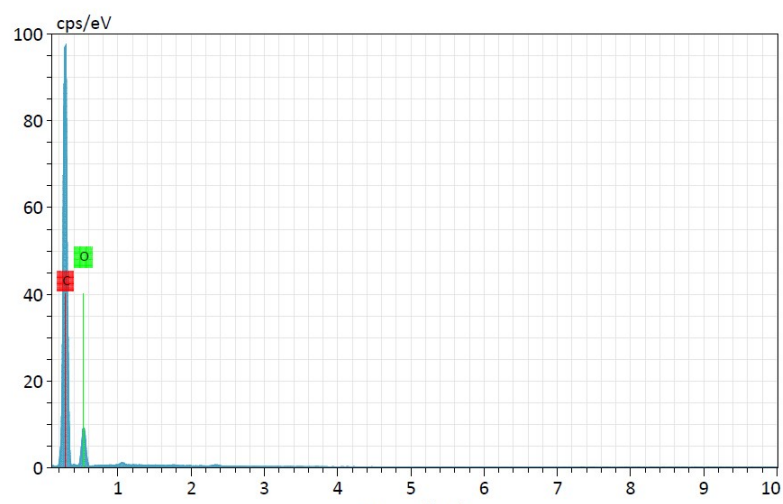

Figure S1. EDX spectrum of GO sample

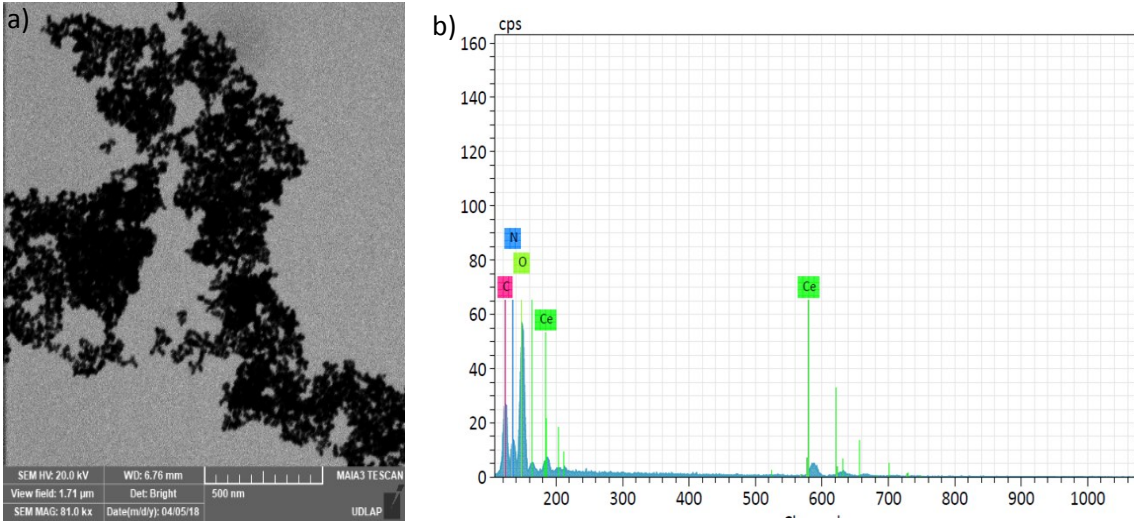

Figure S2. a) Bright field STEM image of CeO<sub>2</sub> nanoparticles and b) EDX analysis of the same material

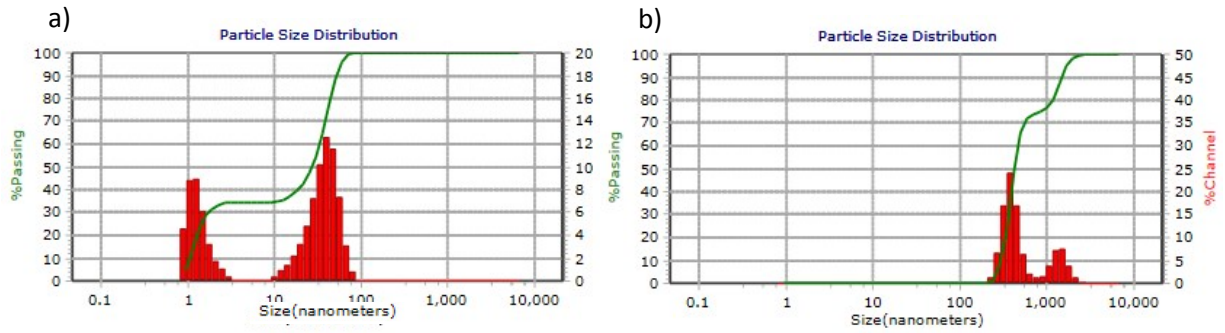

Figure S3. Dynamic light scattering measurements of a) Ag and b) CeO<sub>2</sub> nanoparticles

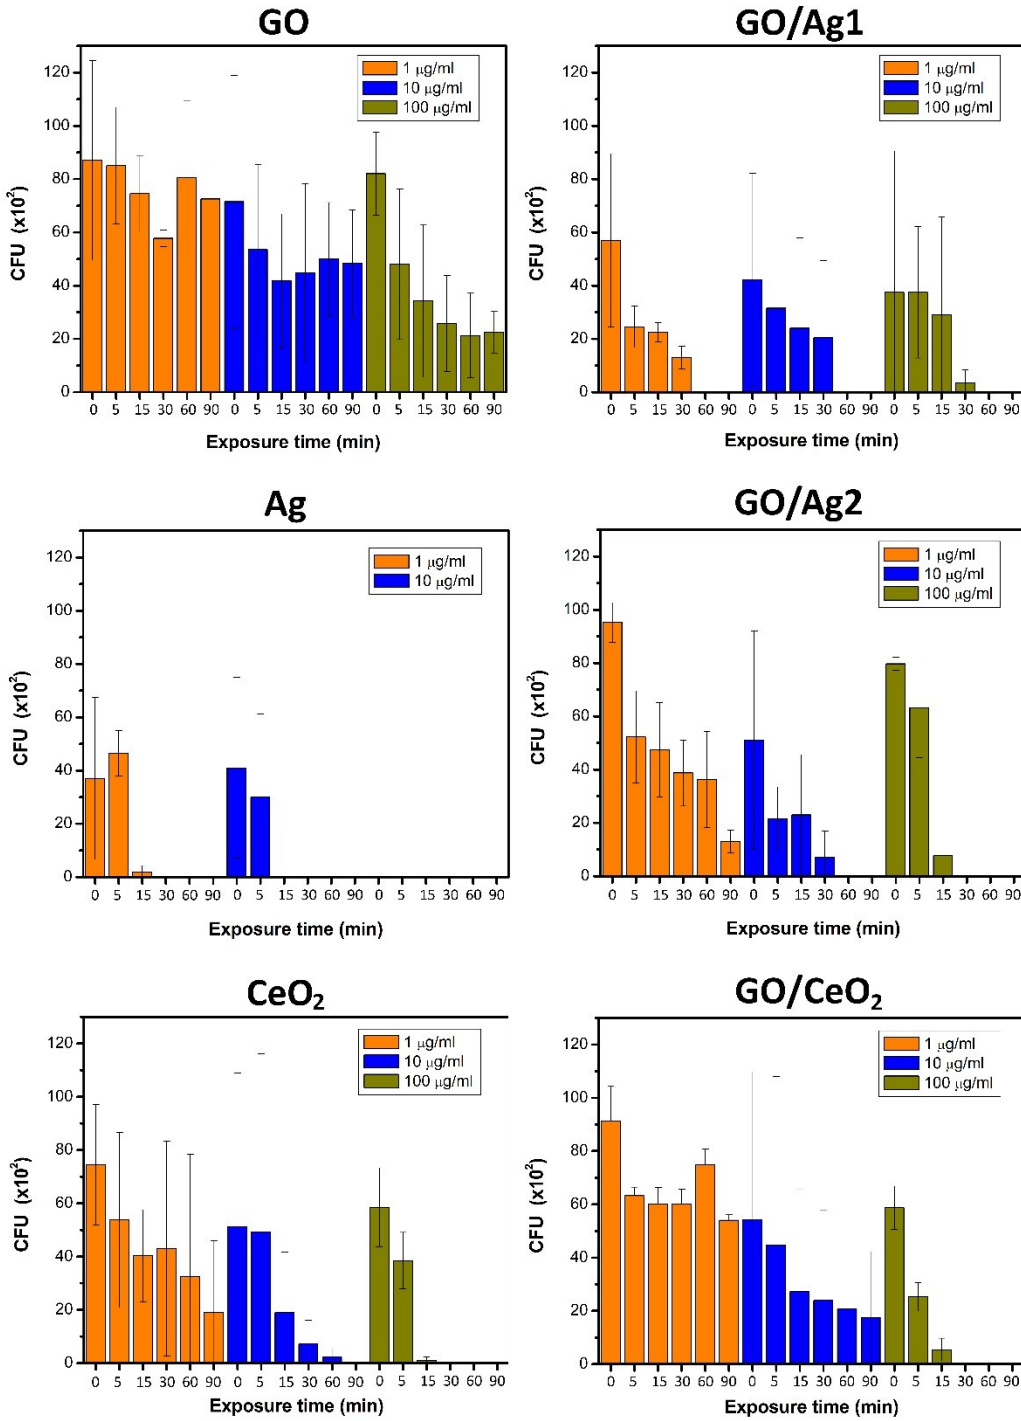

Figure S4. Colony forming units (CFU) count for *E. coli* when exposed to the tested materials at exposure times of 0, 5, 15, 30, 60 and 90 minutes in sterile water and then plated in Petri dishes with agar

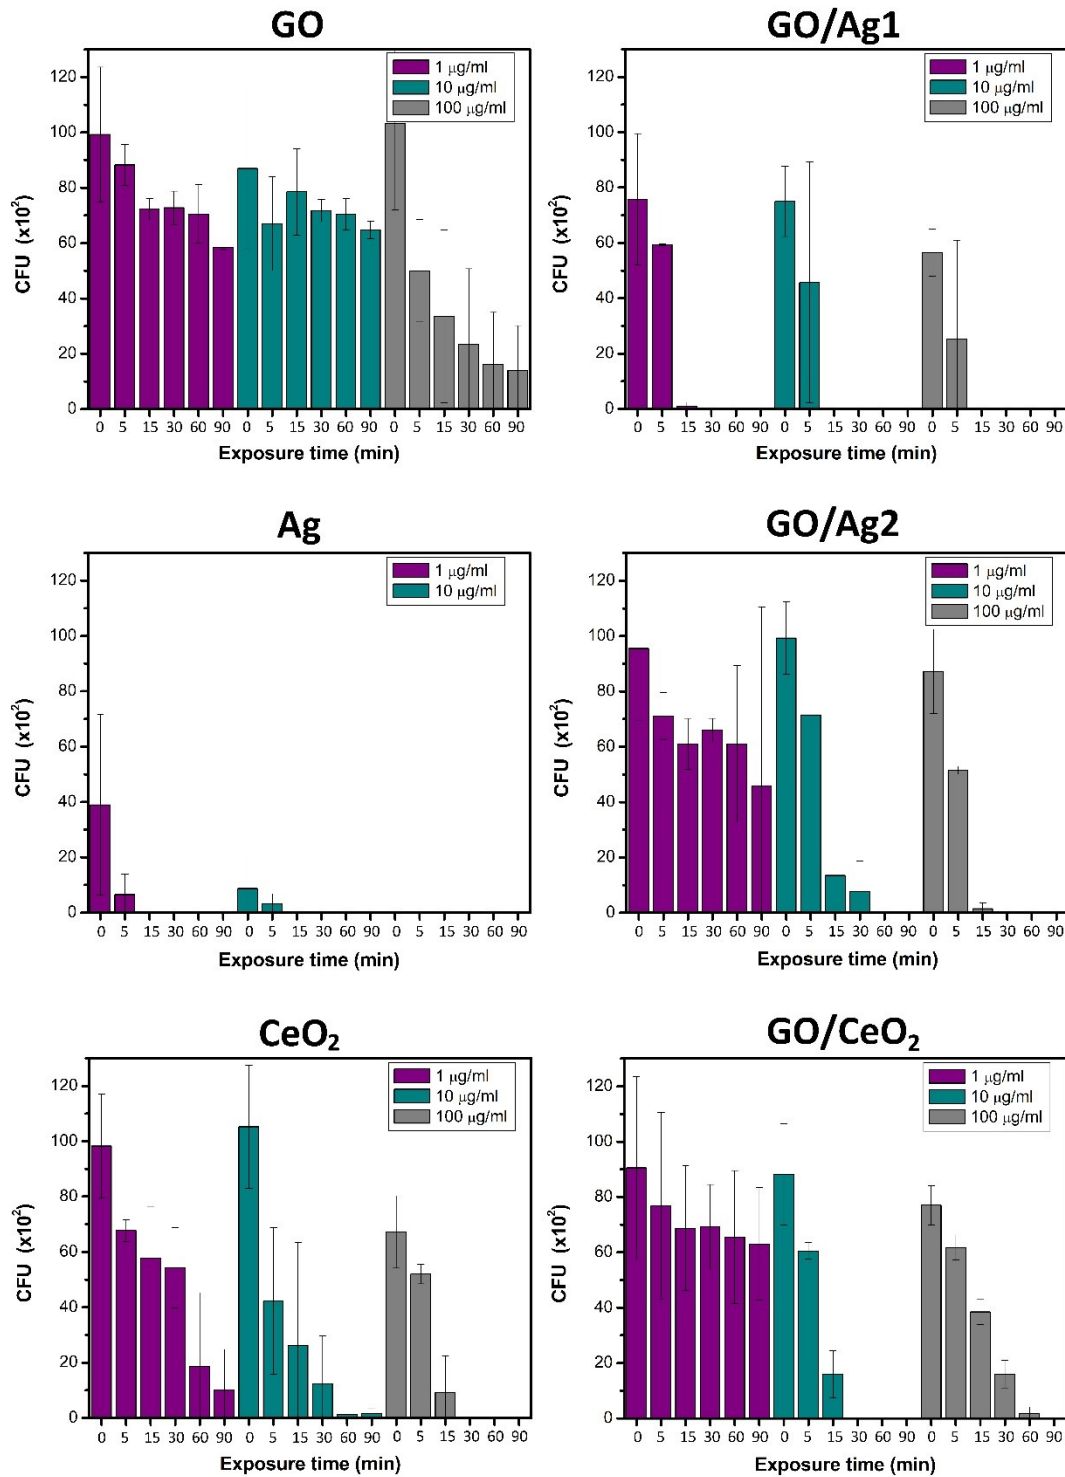

Figure S5. Colony forming units (CFU) count for *Salmonella serovar Typhimurium* when exposed to the tested materials at exposure times of 0, 5, 15, 30, 60 and 90 minutes in sterile water and then plated in Petri dishes with agar
